# Supplementary material
Source: Research Square preprint supplement (doi:10.21203/rs.3.rs-10150766/v1)
Supplement: Supplementary file 1 [file 0bd1b4b80c0646fc74038bed.docx]

**Supplementary Information**

# Table of Contents

Data Sources for the Models …..page 2

*Supplementary Table 1. Data inputs/sources for all models* …..page 2

Supplementary Methods …..page 3

*Supplementary Table 2. Workshop Objectives & Participants…..*page 4

*Habitat Risk Assessment Model Methods…..*page 6

*Supplementary Table 3. Habitat Risk Assessment Model Inputs for Mangroves in 2020* …..page 8

*Supplementary Table 4. Baseline Mapping Inputs for Mangrove Health Conditions* …..page 10

*Carbon Model Methods…..*page 10

*Supplementary Table 5. Blue Carbon Model Inputs* …..page 10

*Lobster Fishery Model Methods…..*page 12

### Supplementary Table 6. Lobster Fishery Model Mangrove Area …..page 12

*Tourism Model Methods…..*page 12

*Supplementary Table 7. Tourism and Recreation Model* *Variables*…..page 13

*Sociocultural Mapping Methods…..*page 14

*Supplementary Figure 1. Values and associated statements displayed at the workshop table* …..page 14

Data Repository …..page 16

# Data Sources for the Models

### Supplementary Table 1. Data inputs/sources for all models

| **Model** | **Data Input** | **Year** | **Extent** | **Type** | **Resolution** | **Source** |
| --- | --- | --- | --- | --- | --- | --- |
| Blue Carbon, Spiny Lobster Fishery, Tourism & Recreation | Mangrove extent basemap | 2024 | Belize | vector | 30m | Landsat 5, 7 & 8 imagery classified by Cherrington et al. 2020 (national); Google Satellite Imagery 2023 (manual digitization); Fragments of Hope Drone Imagery (2019) digitized by The Nature Conservancy Drone Imagery (2021) for the Placencia area for the Placencia area; Ground truth mangrove presence/absence data collected by Baron-Aguilar et al. 2024 (*unpublished*); Participatory mapping workshop one capturing extent |
| Blue Carbon, Spiny Lobster Fishery, Tourism & Recreation | Mangrove health condition | 2024 | Belize | vector | NA | InVEST Habitat Risk Assessment of mangroves in Belize by Delevaux et al. 2022; Mangrove health conditions map created by Villarreal-Rosas et al. 2026 (*unpublished*), using a combination of remote sensing, spatial analysis, field-verified data, and community participatory mapping data; Participatory mapping workshop one capturing mangrove health (healthy, degraded, cleared) |
| Blue Carbon, Spiny Lobster Fishery, Tourism & Recreation | Restoration nature-based solutions scenario | 2025 | Placencia Lagoon | vector | NA | Participatory mapping workshop three (Table 1) |
| Blue Carbon, Spiny Lobster Fishery, Tourism & Recreation | Conservation nature-based solutions scenario | 2025 | Placencia Lagoon | vector | NA | Participatory mapping workshop three (Table 1) |
| Blue Carbon, Spiny Lobster Fishery, Tourism & Recreation | Placencia Lagoon Management Plan scenario | 2015 | Placencia Lagoon | vector | NA | Landsat 8 imagery used to create the proposed Placencia Lagoon Management Plan boundary for the Placencia Lagoon Management Plan 2015-2020 prepared by Wildtracks in partnership with WWF, Southern Environmental Association Belize, and Friends of Placencia Lagoon |
| Blue Carbon | Carbon densities | 2023 | Belize | point | 10 m | Carbon densities from Morrissette et al. 2023 |
| Tourism & Recreation | Visitors (Response) | 2024 | Belize | vector | NA | InVEST Recreation & Tourism Model |
| Tourism & Recreation | Mangroves | 2024 | Belize | vector | NA | Landsat 5, 7 & 8 imagery classified by Cherrington et al. 2020, Fragments of Hope Drone Imagery (2019) digitized by The Nature Conservancy Drone Imagery (2021), Google Satellite Imagery 2023 |
| Tourism & Recreation | Coral |  | Belize | vector | NA | Delevaux et al. 2024, HRI 2020 coral layer, Fragments of Hope Drone Imagery (2019) digitized by The Nature Conservancy Drone Imagery (2021) |
| Tourism & Recreation | Beach | 2024 | Placencia Peninsula | vector | NA | Participatory workshop two |
| Tourism & Recreation | Seagrass |  | Belize | vector | NA | GEOBON 2020 |
| Tourism & Recreation | Marine Protected Areas |  | Belize | vector | NA | CZMAI 2021 |
| Tourism & Recreation | Fishing areas | 2024 | Belize |  |  | Participatory workshop two |
| Tourism & Recreation | Development | 2024 | Belize |  |  | Participatory workshop two |
| Tourism & Recreation | Points of Interest (e.g. hotels, restaurants) |  | Belize | point |  | Participatory workshop two |
| Tourism & Recreation | Dredged Areas | 2024 | Placencia Peninsula | vector | NA | Participatory workshop two |

#

# Supplementary Methods

## Workshop Participants

Participants included members of six fishing associations (Belize Fly Fishers, Riversdale Fishers, Riversdale Shark Fishers, National Women in Fisheries, Placencia Producers Cooperative Society Limited, National Fishermen Producers Cooperative Society Limited), two tour guide associations (Placencia and Independence), five village councils (Placencia, Monkey River, Seine Bight, National Garifuna, Independence), three government agencies (Belize Forest Department, Fisheries Department, Land and Survey Department), eight NGOs (Fragments of Hope, Crocodile Research Center, Southern Environmental Association, World Wildlife Fund, Wildlife Conservation Society, Humana Belize, Wildtracks, Healthy Reefs Initiative), one consultancy (Seascape Solutions), and three academic institutions (Stanford University, University of Miami, University of Southern Florida).

### Supplementary Table 2. Workshop Objectives & Participants

| **Workshop & Date** | **Affiliation** | **Sociodemographics** | **Activities / Goals** | **Questions** |
| --- | --- | --- | --- | --- |
| W1  2/2/2024 | - Placencia Tour Guide Association - Fragments of Hope - Crocodile Research Coalition - Placencia Village Council - Mr. Goby + Friends Recycling - Natural Capital Project (Stanford University, Seascape Solutions) - University of Southern Florida | 11 Women  9 Men | Participatory Mapping of Mangrove and Coral Ecosystem Health | Are there corals or mangroves missing from these maps?  Do the coral and mangroves health map match your on the ground assessment?  Are there corals or mangroves that do not exist anymore and should be erased from the current habitat maps?  Where did corals or mangroves previously exist?  Based on the current coastal development and dredging map layers, are those layers representative of current conditions or are there other developments and dredged places?  What are the human activities that are impacting corals and mangroves? Where are they ongoing?  Where are the restoration efforts for corals and/or mangroves?  Where are restoration or conservation efforts most needed? Why? |
| W2  2/3/2024 | - Placencia Tour Guide Association - Fragments of Hope - Crocodile Research Coalition - Placencia Village Council - Mr. Goby + Friends Recycling - Natural Capital Project (Stanford University, Seascape Solutions) - University of Southern Florida | 11 Women  9 Men | Participatory Mapping to Inform the Modeling of Tourism & Recreation and Coastal Hazard Risk | Map out areas that are used primarily by locals and/or foreign tourists.  Where are beaches accessible or prohibited or restricted (due to erosion or land ownership)?  The pink circles represent wildlife areas, are those accurate? Are there additional areas that should be on this map as well?  What areas are of concern to you with growing tourism? |
| W3  10/24/2024 | - Fishers / Fishing Guides - Placencia Tour Guide Association - Monkey River Village Council - National Garifuna Council - Placencia Village Council - Wildlife Conservation Society - Southern Environmental Association (SEA Belize) - Fragments of Hope - Nurse - Belize Forest Department - The Natural Capital Project (Stanford University, Seascape Solutions, University of Miami) - University of Southern Florida - NSF Community Fellows | 18 Women  20 Men | Share Progress on NBS Scenarios and Cobenefits Modeling  Mapping Mangrove and Coral Nature-Based Solutions Priority Sites | Where do you think mangroves and corals should be restored?  Where do you think mangroves and corals should be protected?  What benefits do you hope to gain from the protection or restoration of the places you identified?  What are the challenges for protecting and restoring these places? |
| W4  10/25/2024 | - Fishers / Fishing Guides - Restaurant Industry - Placencia Tour Guide Association - Monkey River Village Council - National Garifuna Council - Placencia Village Council - World Wildlife Fund - Wildlife Conservation Society - Wildtracks - Southern Environmental Association (SEA Belize) - Fragments of Hope - Humana Belize - Nurse - No Occupation - Belize Forest Department - Inter-American Development Bank - The Natural Capital Project (Stanford University, Seascape Solutions, University of Miami) - University of Southern Florida - NSF Community Fellows | 27 Women  32 Men | Mapping Social and Cultural Values of Mangrove Forests and Coral Reefs  Mapping Fisheries Value Chain | What makes these places around the mangroves and coral reefs special?  Identify them with the following characteristics: Beauty, Community, Education, Heritage, Recreation/Relaxation, Other)  What role do you play in the fisheries supply chain? |
| W5  10/25/2025 | - Fishers / Fishing Guides (Clearwater Fishing Charters) - Belize Fly Fishers Association - Riversdale Fisher Association - National Women in Fisheries Association (Hopkins, Seine Bight, Punta Negra, Riversdale) - Riversdale Shark Fisher Cooperative - Tourism Industry - Restaurant Industry - Independence Tour Guide Association - Placencia Tour Guide Association - Monkey River Village Council - Seine Bight Village Council - National Garifuna Council - Independence Village Council - Placencia Village Council - Seine Bight Village Museum - Teacher - Nurse - NAIA Resort - Ikooma Seaweed - World Wildlife Fund - Wildlife Conservation Society - Southern Environmental Association (SEA Belize) - Crocodile Research Coalition - Fragments of Hope - Humana Belize - Healthy Reefs Initiative - Fisheries Department - Belize Forest Department - Land and Surveys Department - The Natural Capital Project (Stanford University, Seascape Solutions, University of Miami) - University of Southern Florida - NSF Community Fellows | 46 Women  61 Men | Sharing Results and Key Messages | What are your reflections on the results?  Why do tourists go where they go? Are any of these visitation sites linked to mangroves?  What information do you think is most valuable to bring to policy makers? |

##

## Habitat Risk Assessment Model Methods

We used the InVEST Habitat Risk Assessment (HRA) model outputs from the Belize 2016 ICZM Ecosystem Services Assessment, a methods guidance document created by the Natural Capital Project in partnership with the Coastal Zone Management Authority and Institute (CZMAI) of Belize to outline the process for updating their 2016 Coastal Zone Management Plan (Delevaux et al. 2022 *unpublished*). The HRA model quantifies the spatial risk posed by human activities to coastal and marine habitats, providing a spatially explicit framework for evaluating cumulative impacts to habitats by integrating information on habitat distribution, the spatial footprint of anthropogenic stressors, and the sensitivity and resilience of habitats to those stressors (see Natural Capital Alliance InVEST User Guide for more model details). Model outputs were used to estimate the effective (functional) area of key coastal habitats and to inform subsequent ecosystem service assessments within the national coastal planning framework. For this paper, we used the risk assessment output of the mangroves for the year 2020.

#### **Model Structure**

The HRA model evaluates habitat conditions based on the interaction between exposure and consequence for each habitat–stressor pair. Exposure represents the likelihood and intensity of contact between a habitat and a stressor, while consequence reflects the potential ecological impact of that stressor on habitat structure, function, and recovery potential. Exposure and consequence are each calculated as the average of several criteria describing spatial overlap, intensity, persistence, habitat sensitivity, and recovery dynamics. Each exposure and consequence criterion is scored on an ordinal scale from 0 to 3, where 0 represents no interaction, and 3 represents a high level of exposure or ecological impact. Scores are derived from spatial data layers describing human activities as well as literature-based estimates of habitat vulnerability and recovery potential. For each habitat–stressor pair, mean exposure and consequence scores are calculated across all criteria. Risk for each grid cell is then calculated as the Euclidean distance from the origin in exposure–consequence space:

Risk = √(Exposure² + Consequence²)

This formulation results in higher risk values when both exposure and ecological consequence are high. The model produces spatially explicit maps of risk for each habitat–stressor interaction as well as cumulative risk across all stressors affecting a given habitat. Risk scores were subsequently classified into four qualitative categories: no risk, low risk, medium risk, and high risk.

#### **Habitat and Stressor Layers**

The HRA model was implemented for Belize across three planning time steps representing baseline conditions and future management scenarios (2016, 2020, and 2025). Model inputs included spatial layers representing coastal habitat distributions and the geographic footprint of major human activities occurring within a 3-km coastal planning zone extending offshore and inland from the Belize coastline. Three habitat types were included in the analysis due to their ecological importance and role in providing ecosystem services: coral reefs, mangrove forests, and seagrass beds. These habitats support fisheries productivity, tourism, shoreline protection, and biodiversity conservation across the Belize Barrier Reef system. Eight anthropogenic stressors representing major coastal economic sectors were included in the HRA model:

1. Agricultural runoff (sediment export)
2. Aquaculture
3. Coastal development
4. Dredging and mineral extraction
5. Fishing
6. Oil exploration and concessions
7. Marine recreation
8. Marine transportation

Spatial layers for each stressor were compiled from national government datasets, stakeholder consultations, remote sensing analyses, and regional marine planning projects. Where necessary, point or line features were buffered to represent their spatial influence on nearby habitats (e.g., dredging permits buffered by 2.5 km). Stressor layers were updated for each scenario to reflect observed changes in coastal development and projected management conditions. The HRA model was run independently for each planning year using the corresponding habitat and stressor datasets. Resulting risk rasters were summarized by habitat type and aggregated to Coastal Planning Units used in Belize’s coastal management framework.

#### **Functional Habitat Estimation**

To support subsequent ecosystem service modeling, HRA risk categories were translated into estimates of functional habitat area, representing the effective ecological capacity of habitats to provide ecosystem services. Following the approach used in Belize’s Integrated Coastal Zone Management analyses, habitat areas were weighted by risk category:

- Low risk: 100% functional habitat
- Medium risk: 50% functional habitat
- High risk: 0% functional habitat

Functional habitat estimates derived from this analysis were subsequently used as inputs to models of lobster fisheries productivity, coastal protection, and marine tourism within the broader coastal planning assessment.

### Supplementary Table 3. Habitat Risk Assessment Model Inputs for Mangroves in 2020

Mangrove habitat and stressor data inputs for the InVEST HRA model.

| **Category** | **Dataset** | **Year** | **Source** | **Description** | **Spatial Type** | **Exposure Score (0-3)** | **Consequence Score (0-3)** |
| --- | --- | --- | --- | --- | --- | --- | --- |
| Habitat | Mangrove forests | 2019 | Cherrington et al. 2020 | Mangrove extent | Polygon | N/A | N/A |
| Stressor | Agriculture runoff | 2022 | Water Resources Institute Threat Atlas for Belize; Smart Coast | Sediment export | Raster | 3 | 3 |
| Stressor | Aquaculture | 2022 | Belize Fisheries Department, Department of Aquaculture | Shrimp farms | Polygon | 2 | 2 |
| Stressor | Coastal development | 2020 | Biodiversity and Environmental Resource Data System; CZMAI | Built areas | Polygon | 3 | 3 |
| Stressor | Dredging | 2022 | Mining Department; Ministry of Natural Resources, Petroleum & Mining | Dredge sites | Buffered points | 3 | 3 |
| Stressor | Fishing | 2022 | Belize Fisheries Department; Sarteneja Alliance for Conservation and Development; CZMAI | Fishing zones | Polygon | 2 | 2 |
| Stressor | Oil exploration | 2022 | Geology & Petroleum Department in the Ministry of Energy, Science & Technology and Public Utilities | Concessions | Polygon | 2 | 3 |
| Stressor | Marine recreation | 2022 | Tourism data from websites and stakeholder sources | Recreation zones | Polygon | 2 | 2 |
| Stressor | Marine transportation | 2022 | Belize Port Authority; GEOBON; Flanders Marine Institute; VLIZ; Marine Regions | Shipping routes | Buffered lines | 2 | 2 |

### Supplementary Table 4. Baseline Mapping Inputs for Mangrove Health Conditions

Patch-level mangrove health condition categories and definitions created by Villarreal-Rosas et al. (2026 *unpublished*). Categories are in order of least disturbed to most disturbed mangrove conditions. We simplified the seven patch level classifications down to three health conditions: healthy, degraded, and cleared.

| **Mangrove Health Conditions** | **Patch Level Category** | **Definition** |
| --- | --- | --- |
| Healthy | Stable | Low amounts of standing dead and/or leaf damage, no obvious anthropogenic disturbance |
| Degraded | Regeneration | Relatively healthy individual trees but either sparse or the sites are heavily disturbed by pollution, cutting, palms, debris, high water, etc |
| Degraded | Degraded or cleared but showing natural regeneration. Mix of healthy but sparse individuals, portion of dying branches and low recruitment. Sites heavily disturbed by anthropogenic or natural drivers |
| Cleared | Transitioning | Mostly cleared and transitioning into other ecosystems due to pollution, topographic or tidal flow alterations |
| Cleared | Vegetation completely removed but roots and branches are still in the site, construction in imminent |
| Filled | Cleared and filled in with construction material |
| Construction | Built infrastructure present at site, or site is under construction |

## Carbon Model Methods

We used the InVEST Carbon Storage and Sequestration model to estimate tourism (see Natural Capital Alliance InVEST User Guide for more model details). In the blue carbon model, we assumed that restored mangroves provide benefits equivalent to healthy mangroves after 10 years. In practice, recovery trajectories depend on intervention type (e.g., hydrologic restoration versus planting), site constraints, and continued exposure to stressors. Some benefits (particularly soil carbon accumulation) may lag longer. Incorporating field-based indicators (e.g., mangrove canopy structure, density, recruitment, soil properties, hydrologic connectivity) would improve estimates of service delivery and restoration trajectories.

### Supplementary Table 5. Blue Carbon Model Inputs

Blue carbon model biophysical table inputs, including the mangrove health category as the LULC type and four carbon pool densities. Each classification was assigned a land use code and associated organic carbon densities for the four carbon pools (MgC/ha). We used carbon stock data for Belize from Morissette et al. 2023 to assign the carbon densities for each mangrove health condition and calibrated parameters using Villarreal-Rosas et al. (2026 *unpublished*) patch-level categories. We defined healthy mangrove to have 50-100% cover and therefore assigned 100% of the carbon density in each pool. Degraded and regenerated mangrove were defined to have 10-50% cover and therefore 50% of the carbon density as healthy mangrove in each pool. Transitioning and cleared mangrove were assigned 10% of the carbon density in each pool, and filled or construction sites were assigned 0% in the aboveground biomass pool and 5% of the healthy mangrove carbon density in the remaining three pools.

| **lucode** | **LULC_name** | **C_above** | **C_below** | **C_soil** | **C_dead** | **Note** |
| --- | --- | --- | --- | --- | --- | --- |
| 1 | Mangrove - Healthy | 44.305 | 23.768 | 369.701 | 5.372 | Healthy mangroves 50-100% coverage |
| 2 | Mangrove - Degraded | 22.1525 | 11.884 | 184.8505 | 2.686 | Degraded mangroves 10-50% coverage. |
| 3 | Mangrove - Regeneration | 22.1525 | 11.884 | 184.8505 | 2.686 | Regeneration mangroves 10-50% coverage. |
| 4 | Mangrove - Cleared | 4.4305 | 2.3768 | 36.9701 | 0.5372 | Cleared mangroves <10% coverage |
| 5 | Mangrove - Transitioning | 4.4305 | 2.3768 | 36.9701 | 0.5372 | Transitioning mangroves 10% coverage |
| 6 | Mangrove - Filled | 0 | 1.1884 | 18.48505 | 0 | Filled mangrove <5%, no coverage on top |
| 7 | Mangrove - Construction | 0 | 1.1884 | 18.48505 | 0 | Construction mangrove <5%, no coverage on top |

## Lobster Fishery Model Methods

We conducted the analysis using updated spatial datasets representing key marine habitats and management zones. We used the mangrove baseline map to evaluate changes in healthy mangrove extent under each scenario. Coral reef data were based on baseline coral cover predictions generated from 2018–2023 spatial predictive models trained on Healthy Reef Initiative monitoring data (Delevaux et al. 2024 for more details) and enhanced by Fragments of Hope and TNC for the inner cayes. Seagrass extent was derived from national habitat maps (2021), using only areas classified as ‘Seagrass dominated’. We refined fishing zones to exclude no-take areas and marine protected areas that prohibit or restrict commercial fishing of lobster. We updated the marine protected area layer and consolidated it to reflect current protection levels and to identify areas with mangrove inclusion. We standardized all spatial datasets to the WGS_1984_UTM_Zone_16N coordinate system and spatially intersected them with a buffered Coastal Planning Unit layer to define consistent management units across the analysis.

### Supplementary Table 6. Lobster Fishery Model Mangrove Area

Total square kilometers of mangrove in the baseline and restoration scenario in the Southern Central Region Coastal Planning Unit (CPU), used to calculate the density of lobster production under each scenario.

| **CPU #** | **CPU Name** | **Baseline (km²)** | **Restoration Scenario (km²)** | **Total Restored Area (Restoration - Baseline) (km²)** | **# Cells Mangroves Restored** | **Whole Lobster Total Catch Change (lbs) Restoration Scenario** | **Whole Lobster Catch change in lbs per cell in this region** |
| --- | --- | --- | --- | --- | --- | --- | --- |
| 8 | South Central Region (Placencia) | 26.90 | 31.91 | 5.01 | 156974 | 3728.9500 | 0.02375520787 |

## Tourism Model Methods

We used the InVEST Visitation: Recreation and Tourism model to estimate tourism (see Natural Capital Alliance InVEST User Guide for more model details). To estimate tourism to Placencia, we first created spatially explicit estimates of absolute visitation using Flickr, Twitter, and national tourism statistics. We estimated tourism to 0.65 km2 hexagon grid cells in Placencia by apportioning the total number of international overnight tourists who visited in 2024 (547,370 international overnight visitors as reported by the Belize Tourism Board) according to the proportion of Flickr photo user-days (PUD) and Twitter user-days (TUD) posted within each grid cell (Belize Tourism Board 2024). These proportions were based on the average annual number of user-days posted to each platform (from 2012 to 2017). We assigned equal weight to PUD and TUD, since we had no reason to believe that one was more closely related to tourism in the region than the other (Tenkanen et al. 2017; Fisher et al. 2018; Wood et al. 2020).

To infer visitor preferences, we subsequently modeled the estimated visitor counts as a function of underlying natural, cultural, and infrastructural attributes through multiple linear regression framework (Supplementary Table 7). To further refine predictors of the model (particularly beaches, fishing areas, and dredged areas), we asked participants to identify areas important for tourism, recreation, and recreational fisheries in our second workshop (Table 1, W2). These data were digitized for preliminary analysis of visitation and lobster ecosystem service benefits associated with the presence of mangroves in the south-central district, Stann Creek. We selected features that we expected to drive patterns in visitation; the full set of features is described in Supplementary Table 7. The features explained 48% of the variability in visitation across the region (Adjusted R^2 = 0.4761, Supplementary Table 7).

The tourism model makes a few key assumptions regarding travel patterns and types of travelers. First, we assume that Twitter and Flickr users choose to travel in ways that are representative of all visitors to the region. While we recognize that each of these datasets likely represents a biased sample of visitors, we believe that by including Twitter, in addition to Flickr, we are mitigating some of these biases (Wood et al. 2020). Relatedly, we chose to focus on international tourists for this analysis, due to difficulties in finding reliable empirical data on domestic tourism. In addition, we did not include cruise tourists as they are a relatively small contribution to tourism in Placencia. Finally, the preference model assumes that visitors’ preferences are static throughout time. An implication of this is that we are assuming tourists will place the same value on healthy mangroves in the future as they do today.

### Supplementary Table 7. Tourism and Recreation Model Variables

Tourism model variables and relationships. All variables were significant, adjusted R2=0.4761, n = 5779.

| **Variable** | **Description** | **Coefficient sign** |
| --- | --- | --- |
| Visitors (Response) | Estimated annual visitors per grid cell, based on Flickr, Twitter, and national tourism statistics. | NA |
| Mangroves | Proportion of the grid cell covered by healthy mangrove | + |
| Coral | Proportion of the grid cell covered by coral | + |
| Beach | Proportion of the grid cell covered by sandy beaches | + |
| Seagrass | Proportion of the grid cell covered by seagrass | + |
| Marine Protected Areas | Proportion of the grid cell covered by a marine protected area designation | + |
| Fishing areas | Proportion of the grid cell covered by fished areas where CPUE >0. CPUE data for the recreational fishery in Belize were derived from Fishbrain mobile application records, retrieved via a customized script available on GitHub (davemfish/fishbrain_query.git). The dataset comprised catch locations, timestamps, and species identification, with fishing effort proxied by trip count per 2,000-meter grid centroid and biomass estimated from user-reported size and weight metrics between 2018 and 2025. | + |
| Development | Proportion of the grid cell covered by development | + |
| Points of Interest (e.g., hotels, restaurants) | Number of points of interest within each grid cell. Points of Interest data were downloaded from Open Street Maps. | + |
| Archeological Sites | Distance from archeological sites for each grid cell. Archeological site data was downloaded from Open Street Maps. | + |
| Ports | Distance from ports for each grid cell. Port data was downloaded from Open Street Maps. | + |
| Roads | Length of primary roads within each grid cell. Road data was downloaded from Open Street Maps. | + |
| Marine Transport | Proportion of the grid cell that overlaps with marine transport lines. | - |
| Land Area | Proportion of the grid cell that is land area | + |
| Dredged Areas | Proportion of the grid cell covered by dredged areas. | + |

## Sociocultural Mapping Methods

Community members were asked to place different colored stickers that represented different types of social and cultural connections (Supplementary Fig. 1). To address biases over well-known places and concerns over literature-based values that are not necessarily relevant to the community (Small et. al, 2017), we asked participants to consider both areas on land, the coastline, and in the ocean to establish connections across land and sea scapes. Although values were lifted from literature (Smart et al. 2021; Moore et al. 2022), we consulted with local partners and phrased the experience of social and cultural values as personal statements to ensure that values were relevant to individual members of the community.

### Supplementary Figure 1. Values and associated statements displayed at the workshop table.


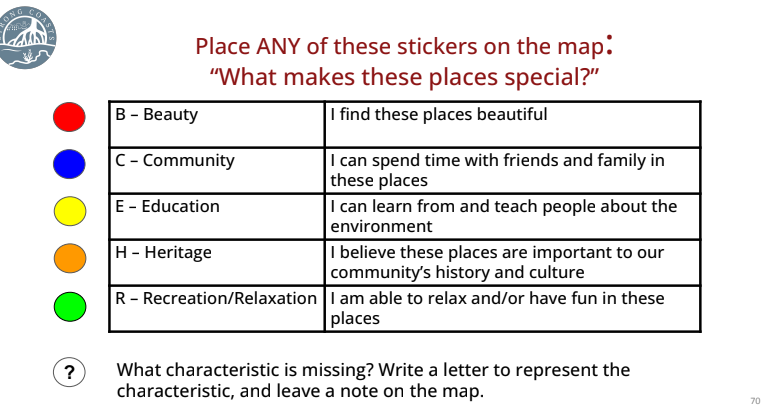


The sticker placements were then digitized into points and summed by area to represent a range from lowest to highest frequency of points (or areas of low to high levels of social and cultural importance). Spatial autocorrelation was used to determine the distance of pattern clustering based on the percentage of points per value (frequency of points/total number of points). Because we considered all values equal (i.e., participants were freely given stickers to place where values were deemed important) and therefore did not apply a ranking process, the attribute weight served as a proxy to consider the maximum threshold of where clustering is significant. For Placencia, a diameter of 1000 m (z-score: 4.51; p < 0.00) was used to create the hexagon areas of 64 ha; while for Caye Caulker, a distance of 500 m was used; for Caye Caulker, a diameter of 500 m was used and further supported by landmark locations.

The workshop consisted of 31 participants representing a diversity of local occupations. Seven participants represented NGOs (WWF, Fragments of Hope, Caye Caulker Strong Mangrove Nursery and Group for Environmental Sustainability, Grass Roots Belize) and one participant represented the Inter-American Development Bank. Twelve participants were tour and fishing guides or vendors, nine participants were in the service industry in hotels, restaurants, and cosmetics, and one participant had no occupation.

#

# Supplementary Information References

1. Belize Tourism Board (2024) Travel & Tourism Statistics Digest 2024. Belize Tourism Board. <https://infogram.com/2024-travel-tourism-statistics-digest-1h0n25o9jjoyl4p>. Accessed 28 June 2025
2. Delevaux JMS, Silver JM, Winder SG, Bood N, Chevez L, Velásquez, Vela ACV, Varlet R, Parta MA, Wolny SA, BAiley A, McField M, Muñiz-Castillo AI, Arkema KK (2024) Social–ecological benefits of land–sea planning at multiple scales in Mesoamerica. Nat Sustain 7, 545–557. <https://doi.org/10.1038/s41893-024-01325-7>
3. Fisher DM, Wood SA, White EM, Blahna D, Lange S, Weinberg A, Tomco M, Lia E (2018) Recreational use in dispersed public lands measured using social media data and on-site counts. J Envi Man 222, 465–474. <https://doi.org/10.1016/j.jenvman.2018.05.045>
4. Moore AC, Hierro L, Mir N, Stewart T (2022) Mangrove cultural services and values: Current status and knowledge gaps. Peop Nat 4(5), 1083-1097. <https://doi.org/10.1002/pan3.10375>
5. Natural Capital Alliance (2026) InVEST User Guide 3.20.0. The Natural Capital Alliance. <https://storage.googleapis.com/releases.naturalcapitalproject.org/invest-userguide/latest/en/index.html>
6. Small, N., Munday, M., & Durance, I. (2017). The challenge of valuing ecosystem services that have no material benefits. Global environmental change, 44, 57-67. <http://dx.doi.org/10.1016/j.gloenvcha.2017.03.005>
7. Smart LS, Vukomanovic J, Sills EO, Sanchez G (2021) Cultural ecosystem services caught in a ‘coastal squeeze’between sea level rise and urban expansion. Glob Env Cha 66, 102209. <https://doi.org/10.1016/j.gloenvcha.2020.102209>
8. Tenkanen H, Minin ED, Heikinheimo V, Hausmann A, Herbst M, Kajala L, Toivonen T (2017) Instagram, Flickr, or Twitter: Assessing the usability of social media data for visitor monitoring in protected areas. Sci Rep 7, 17615. https://doi.org/10.1038/s41598-017-18007-4
9. Wood SA, Winder SG, Lia EH, White EM, Crowley CSL, Milnor AA (2020) Next-generation visitation models using social media to estimate recreation on public lands. Sci Rep 10, 15419. https://doi.org/10.1038/s41598-020-70829-x
